# Supplementary material for: Neuroprotective and Anti-Inflammatory Effects of Kuwanon C from Cudrania tricuspidata Are Mediated by Heme Oxygenase-1 in HT22 Hippocampal Cells, RAW264.7 Macrophage, and BV2 Microglia
Source: PubMed Central journal article supplement (PMC7402286; doi:10.3390/ijms21144839), 2020-07-08
Supplement: ijms-21-04839-s001.pdf [file ijms-21-04839-s001.pdf]

# Supplementary Materials

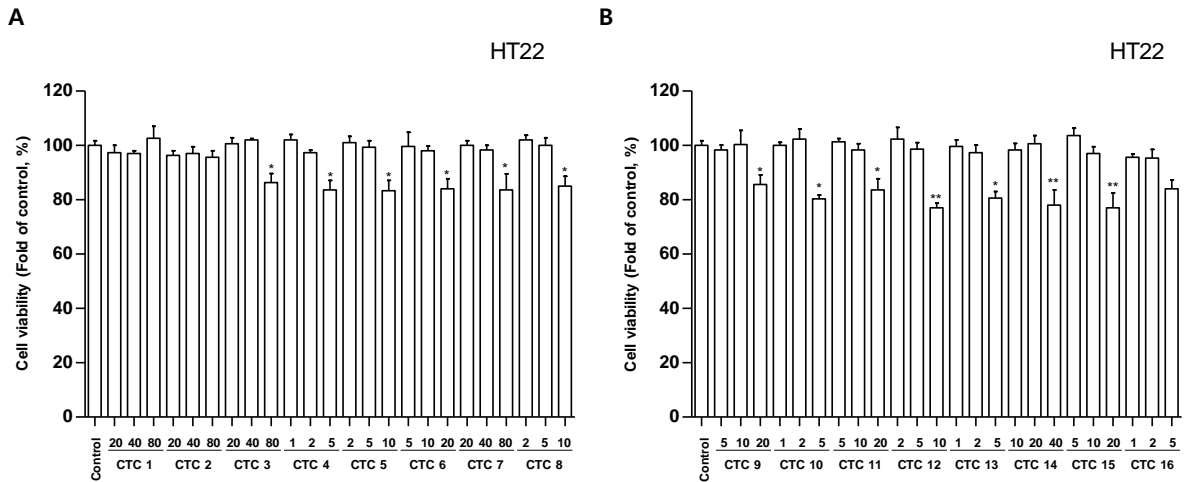

**Figure S1.** Cytotoxicity of CTC 1-16 on HT22 cells. HT22 cells were treated with the various concentration of CTC 1-16 for 48 h. The viability of cells subjected to different concentrations of CTC 1-16 was determined by MTT assay. Data are presented as the mean standard deviation of three independent experiments. \* $p < 0.05$ , \*\* $p < 0.01$  vs. non-treated control.

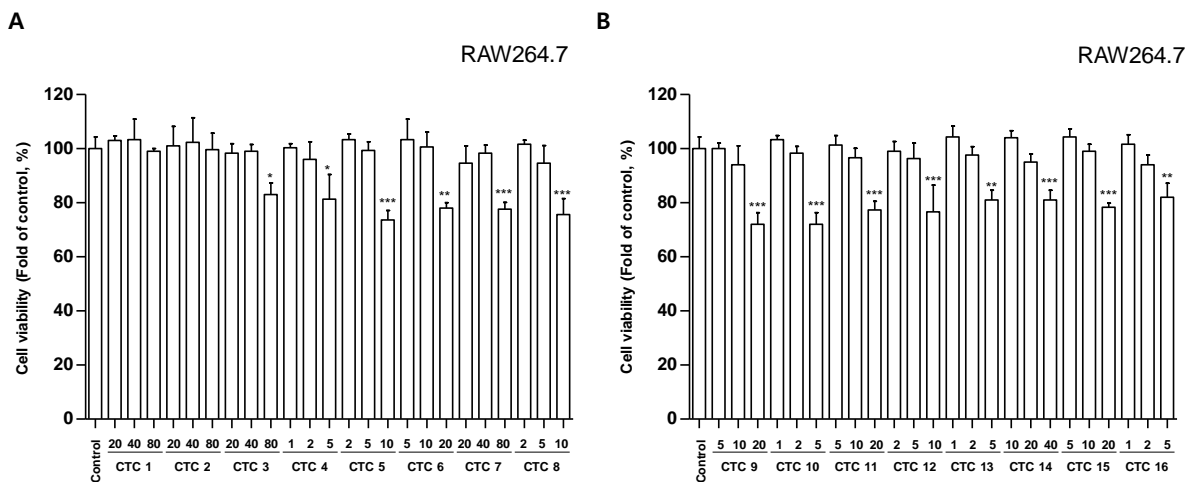

**Figure S2.** Cytotoxicity of CTC 1-16 on RAW264.7 cells. RAW264.7 cells were treated with the various concentration of CTC 1-16 for 48 h. The viability of cells subjected to different concentrations of CTC 1-16 was determined by MTT assay. Data are presented as the mean standard deviation of three independent experiments. \* $p < 0.05$ , \*\* $p < 0.01$ , \*\*\* $p < 0.001$  vs. non-treated control.

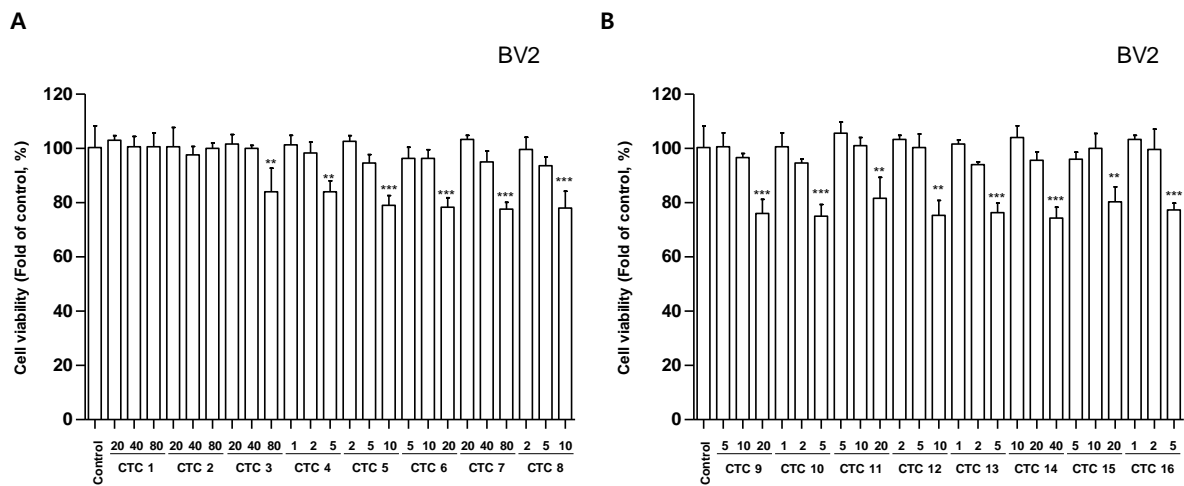

**Figure S3.** Cytotoxicity of CTC 1-16 on BV2 cells. BV2 cells were treated with the various concentration of CTC 1-16 for 48 h. The viability of cells subjected to different concentrations of CTC 1-16 was determined by MTT assay. Data are presented as the mean standard deviation of three independent experiments. \*\* $p < 0.01$ , \*\*\* $p < 0.001$  vs. non-treated control.
